# Supplementary material
Source: MDPI journal article supplement (https://www.mdpi.com/2306-5729/8/4/67)

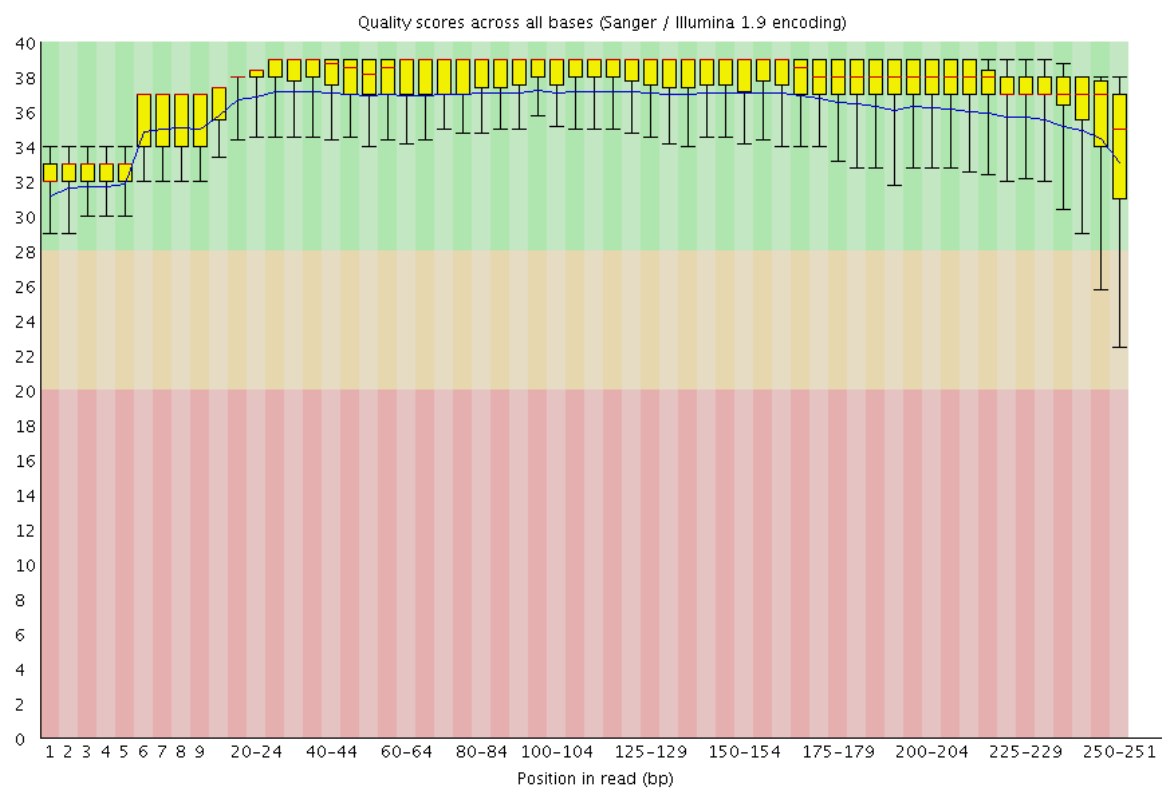

**Figure S1.** Quality scores of *H. annuus* (VIR114A)  $\times$  *H. argophyllus* raw reads

Supplement: s1 [file s1]
